# Supplementary material for: Investigating the potential of DL25 Compound as a Novel Anti-Mycobacterial tuberculosis Agent: A comprehensive In Silico and In Vitro Analysis
Source: Research Square preprint supplement (doi:10.21203/rs.3.rs-4913274/v1), 2024-09-11
Supplement: Supplementary file 1 [file a4fd88f6186bfe3dc9d687b5.docx]

**Figure 1.** The structure of DL00 (precursor) and DL25 compound as sketched by Chemsketch and were used to find sdf file for this investigation (Chemistry of synthesis).

To a solution of desloratadine (500.0 mg, 1.61 mmol) in acetonitrile (20 mL), potassium carbonate (667.0 mg, 4.83 mmol) and 1,3-dibromopropane (81.6 μL, 804.31 μmol) were added. The reaction mixture was stirred under reflux for 6 h. After the completion of the reaction, the reaction mixture was cooled to room temperature, poured into a beaker containing crushed ice (5 g). The isolated precipitate was washed with water (several times) and air dried. The product DL25 was obtained as a pink white solid (632.0 mg, 59%).

Materials and Methodology

Materials and Reagents

Ambient air incubator, Middlebrook 7H9 broth base (Becton Dickinson and Company, Sparks, MD, USA), Middlebrook 7H10 agar base (Becton Dickinson and Company, Sparks, MD, USA), 85% Glycerol (EMSURE® Sigma-Aldrich), OADC Supplement (oleic acid, albumin, dextrose, catalase) (Becton Dickinson GmbH. Heidelberg/Germany), Falcon® 50 mL Conical Centrifuge Tubes, Cell Counting Kit-8, pipettes, CO2 incubator, Pipette Filter tips (Axygen®), PIPETMAN Multichannel P8×200, 20–200μL (Gilson® PIPETMAN®), White 96 Well plate opaque, 8 um syringe filters, syringes 50 mL, Sterile tips, Microtubes 1.5 ml (Eppendorf®), Glomax 20/20 Luminometer, Perkin Elmer EnVision Microplate reader (Molecular Devices Corporation, 1311 Orleans Drive, Sunnyvale, California 94089). *MTB H37AlRa*, *H37AlMs*, *H37AlMab*, and *H37Almm* strains maintained in our laboratory were used in this study. DL25 compound was synthesized by Guangzhou institute of Biomedical and Health (Guangzhou, China), Chemistry Laboratory. Eleven (11) antibiotics were provided by Liu (Guangzhou, China) for the experiment.

Eleven commercial Drugs and DL25 Compound preparation

The following antimicrobial agents were prepared: Vancomycin (Van), Rifampicin (RIF), Ethambutol (EMB), Amikacin (Amk), Levofloxacin (LVF), Linezolid (LZD), Bedaquiline (BDQ), Para-aminosalicylic Acid (PAS), Isoniazid (INH), Ethionamide (ETH), Chloramphenicol (Cla), and DL25 compound. Initial stock solutions of both DL25 compound and eleven (11) antibiotic agents were prepared based on their minimum inhibitory concentration (MIC) values. Subsequent dilutions were carried out in 10% oleic acid bovine albumin dextrose catalase (OADC)-enriched Middlebrook 7H9 broth (Difco Laboratories).

Checkerboard assay for studying synergy

Combinations of DL25 compound and eleven commercially available antibiotics were tested against bacterial stocks of H37ra from exponential-phase cultures using the checkerboard technique by dispensing DL25 compound in the X-axis and antibiotics in the Y-axis of the 96-well microdilution tray, except for the first well on the left, in the order from low concentration to high concentration. 198µl of inoculum was added to 96-well microtiter plates containing a serial, two-fold diluted DL25 compound and antibiotic. The synergy of the combination (DL25 with antibiotics) was tested at MIC, 1*MIC, 2*MIC, 4*MIC, 8*MIC, and 16*MIC. The concentration ranges were determined using previously obtained MIC values for the DL25 compound and antibiotics. Each combination was tested in triplicate. In all cases, the MIC endpoints were defined as the lowest DL25 compound concentration alone or in combination, resulting in <10% growth compared to the growth control. The results were evaluated by calculating fractional inhibitory concentration indexes (FICIs) and evaluating antibacterial interactions as follows: First, FICs for antimicrobial A or B were determined as follows:

where A and B are the MICs of each antibiotic when combined with the DL25 compound (in a single well), and MICA and MICDL25 are the MICs of each antibiotic and DL25 compound separately. The antibacterial combination was termed synergistic when the FICI was ≤0.5, partially synergistic (0.5 ≤ FICI ≤ 1.0), additive when the FICI = 1.0, indifferent (1.0 ≤ FICI ≤ 4.0), or antagonistic when the FICI was > 4.

Table 1. MIC comparison of the DL25 compound with commercially available antibiotics against *M. tuberculosis H37Alra*.

| **Antimicrobial agent** | **MIC (μg/ml)** | | **Mode of action/ Target** |
| --- | --- | --- | --- |
| DL25 | 4 - 2 | Under study | |
| Vancomycin (VAN) | 6.25 - 200 | Cell wall synthesis | |
| Ethionamide (ETH) | 4 – 2 | Mycolic acid biosynthesis | |
| Levofloxacin (LVF) | 0.125 | DNA gyrase and topoisomerase IV | |
| Para-aminosalicylic acid (PAS) | 0.249 | Folic acid synthesis | |
| Bedaquiline (BDQ) | 0.5 | Energy metabolism/atp | |
| Isoniazid (INH) | 0.125 | Cell wall synthesis/InhA | |
| Rifampin (RIF) | 0.125 | RNA polymerase/RpoB | |
| Ethambutol (EMB) | 8 | Cell wall synthesis/EmbA | |
| Amikacin (AMK) | 2 – 4 | 30S ribosomal subunits | |
| Linezolid (LZD) | 1.0 - 2 | Protein synthesis/rRNA | |
| Clarithromycin (Cla) | 2.0 | 50S ribosomal subunit | |

Table 2. FIC-Index of DL25 compound plus eleven commercially available antibiotics against *M. tuberculosis H37Alra.*

| Drug/DL25  combination | MIC (μg/ml) of combination | | FICI | Effect |
| --- | --- | --- | --- | --- |
| DL25 | Antibiotics |
| DL25-Van | 2/4 | 8/8 | 1.5 | Indifferent |
| DL25-RIF | 2/ 4 | 0.1/0.025 | 0.75 | Partially Synergism |
| DL25-EMB | 2/4 | 0.1/0.5 | 0.7 | Partially Synergism |
| DL25-AMK | 2/4 | 0.5/0.5 | 1.5 | Indifferent |
| DL25-LVF | 2/4 | 0.125/0.25 | 1.0 | Indifferent |
| DL25-LZD | 1/4 | 1/2 | 0.75 | Partially Synergism |
| DL25-BDQ | 1/4 | 0.125/0.25 | 0.75 | Partially Synergism |
| DL25-PAS | 2/4 | 0.25/0.5 | 1.0 | Indifferent |
| DL25-INH | 2/4 | 0.625/1.25 | 1.0 | Indifferent |
| DL25-ETH | 2/4 | 0.5/4 | 0.625 | Partially Synergism |
| DL25-Cla | 2/4 | 0.25/0.5 | 1.0 | Indifferent |

Figure 1.MIC fold-reduction of combinations exhibiting in vitro synergistic interactions when tested against *M. tuberculosis H37Ra (Alar)* byshowing mean from triplicate experiment.

Interestingly, in addition to in vitro bacteriostatic and bactericidal effects, DL25 compound also showed Partially synergistic effects against *M. tuberculosis H37Ra* in combination with first and second-line anti-tuberculosis drugs as shown in table 1. However, on which way such anti-tuberculosis activity improvement was achieved between DL25 compound and these antibiotics are needed further validation study. The results of the checkerboard tests revealed decrease in the MIC with DL25 compound and antimycobacterial RBF, BDQ, RIF, ETH, and LZD combination as shown in figure 1. Thus, DL25 compound enhances the therapeutic activity of RBF, BDQ, RIF, ETH, and LZD against *M. tuberculosis H37Ra* due to Partially synergistic interaction. The MIC for RBF, RIF, and ETH was reduced almost 2 times, when used in combination with DL25 compound. But, DL25 compound exhibited Indifferent with the rest of antibiotic, both returning a fractional inhibitory concentration index (FICI) value of 1.5 and 1.0, respectively as shown in table 3.

|  | **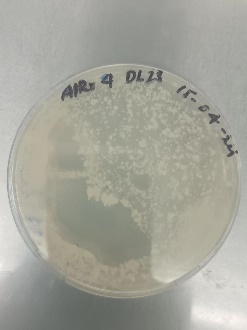** | **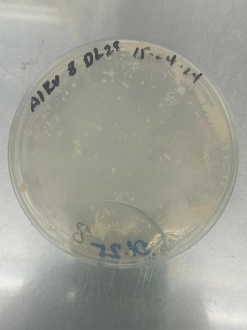** | **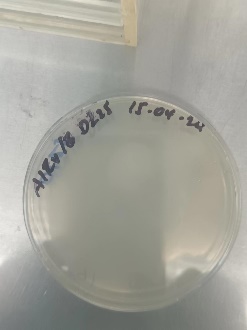** | **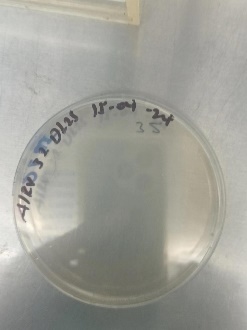** |
| --- | --- | --- | --- | --- |
| **Concentrations (µg/ml)** | **4** | **8** | **16** | **32** |

**Figure 1.** The *Mycobacterium tuberculosis* (*AlRa*) has higher level of sensitivity to DL25 compound.
